# Supplementary material for: Colorimetric chemosensor for multiple targets, Cu2+, CN−and S2−
Source: Royal Society of Chemistry journal article supplement (doi:10.1039/c5ra27553a), 2016-01-01
Supplement: c5ra27553a1.pdf [file c5ra27553a1.pdf]

## Supporting Information

### Colorimetric chemosensor for multiple targets, $\text{Cu}^{2+}$ , $\text{CN}^-$ and $\text{S}^{2-}$

Ka Young Ryu, Jae Jun Lee, Jin Ah Kim, Dae Yul Park, Cheal Kim\*

Department of Fine Chemistry and Department of Interdisciplinary Bio IT Materials, Seoul National University of Science and Technology, Seoul 139-743, Korea. Fax: +82-2-973-9149; Tel: +82-2-970-6693; E-mail: [chealkim@seoultech.ac.kr](mailto:chealkim@seoultech.ac.kr)

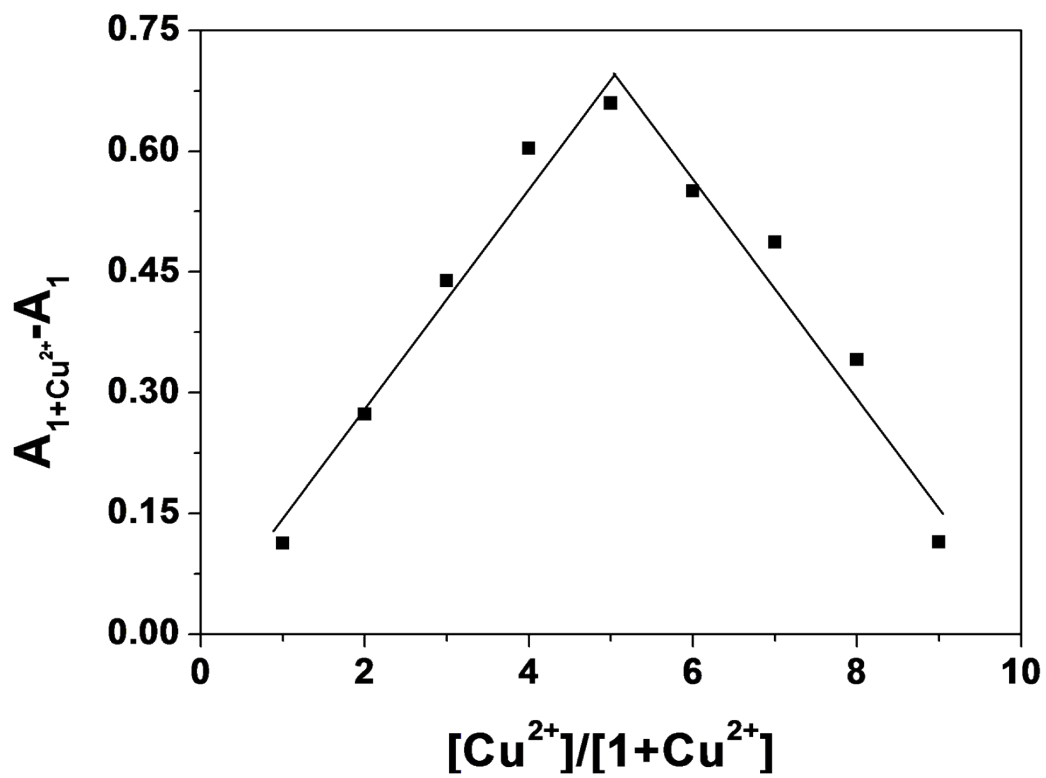

**Figure S1.** Job plot for the reaction of **1** with  $Cu^{2+}$ . Absorbance at 412 nm was plotted as a function of the molar ratio  $[Cu^{2+}]/([1+Cu^{2+}])$ . The total concentrations of  $Cu^{2+}$  with **1** were 100  $\mu M$ .

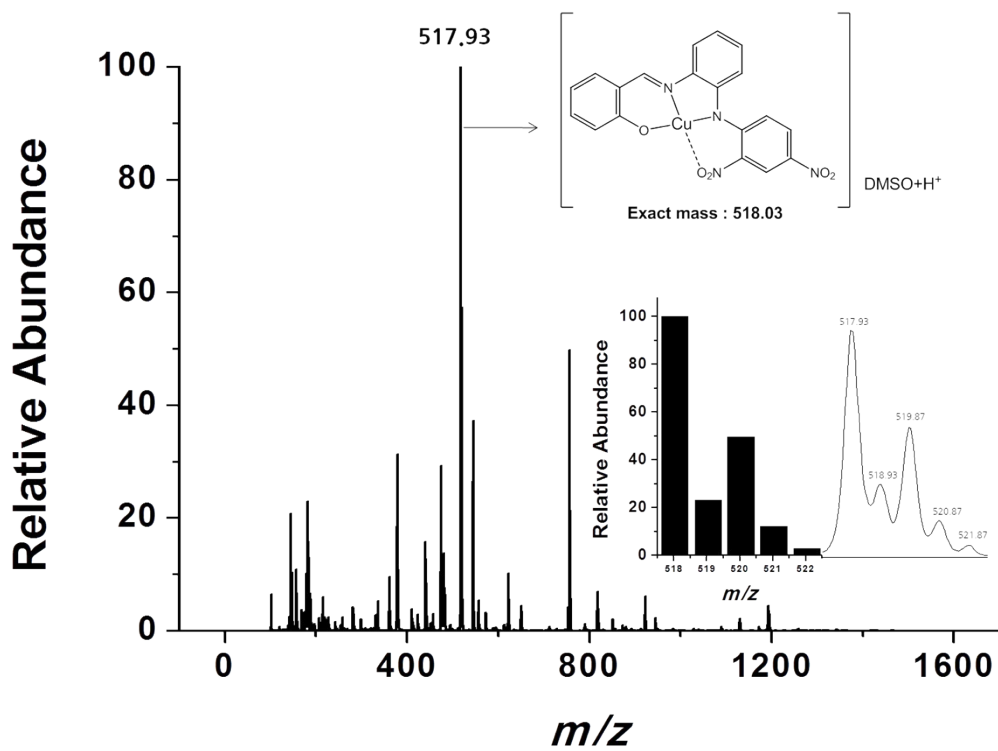

**Figure S2.** Positive-ion electrospray ionization mass spectrum of **1** (0.1 mM) upon addition of Cu<sup>2+</sup> (0.1 mM).

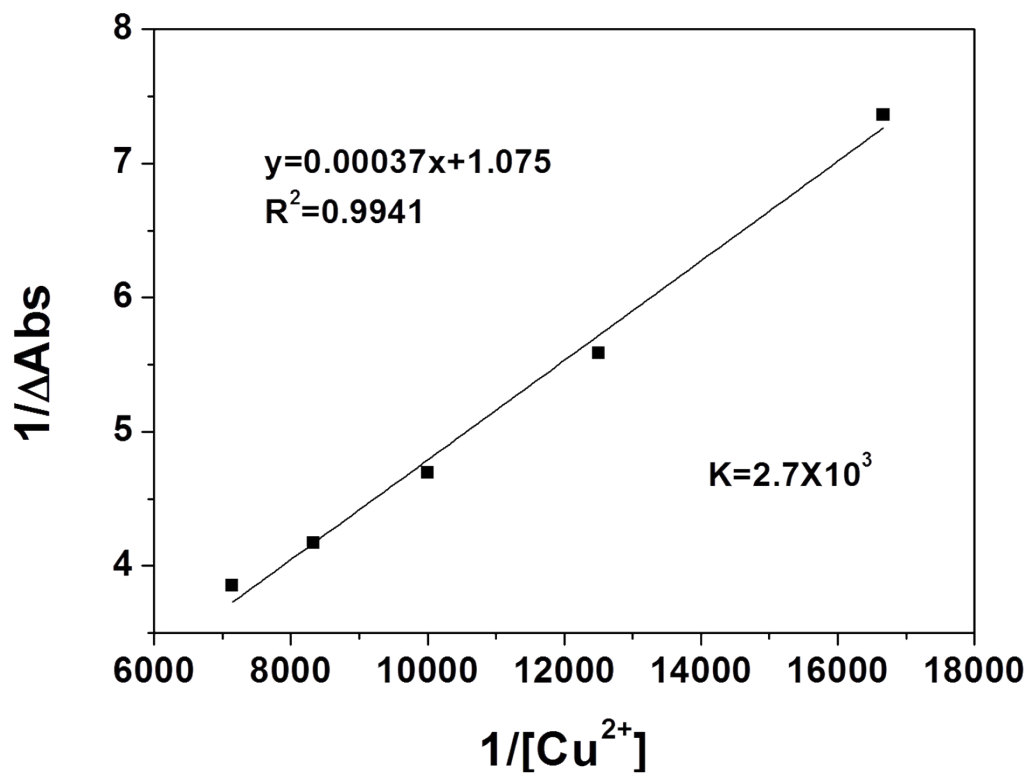

**Figure S3.** Benesi-Hildebrand equation plot (absorbance at 412 nm) of **1** (20  $\mu\text{M}$ ), assuming 1:1 stoichiometry for association between **1** and  $\text{Cu}^{2+}$ .

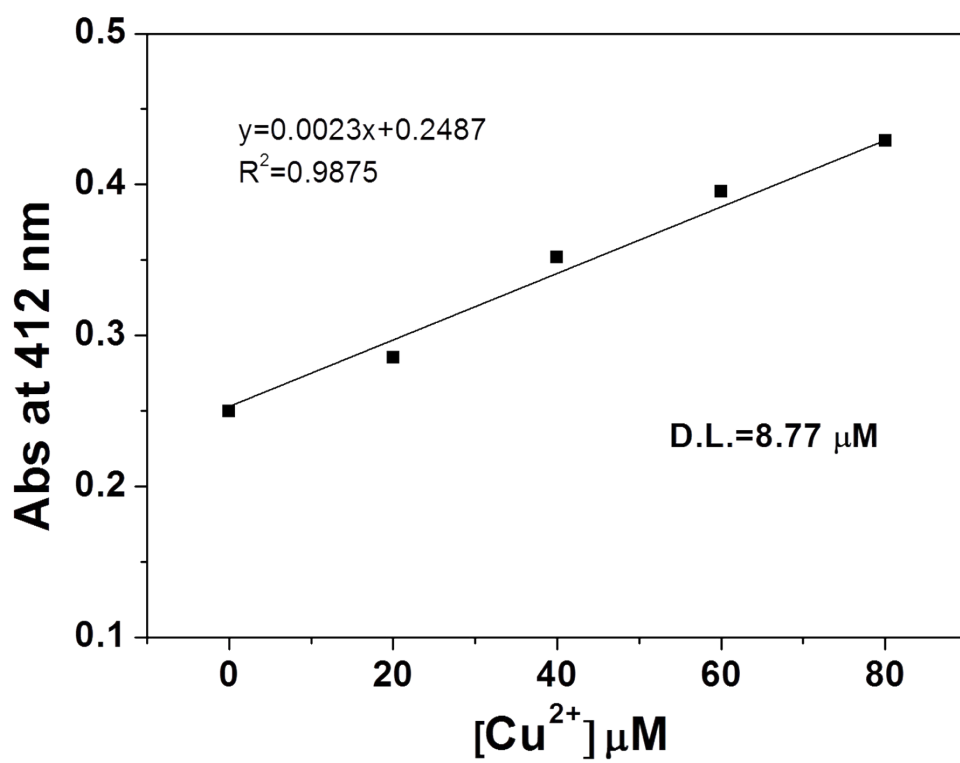

**Figure S4.** Determination of the detection limit based on change in the ratio (absorbance at 412 nm) of **1** (20  $\mu M$ ) with  $Cu^{2+}$ .

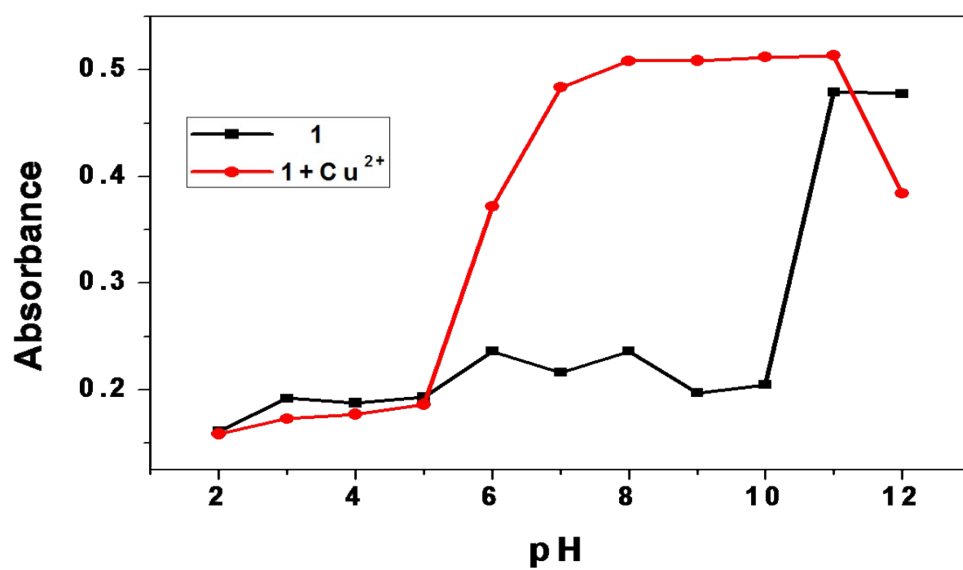

**Figure S5.** Absorbance of **1** and **1**-Cu<sup>2+</sup> complex (412 nm) at different pH values (2-12) in a mixture of bis-tris buffer/DMSO (1:1, v/v).

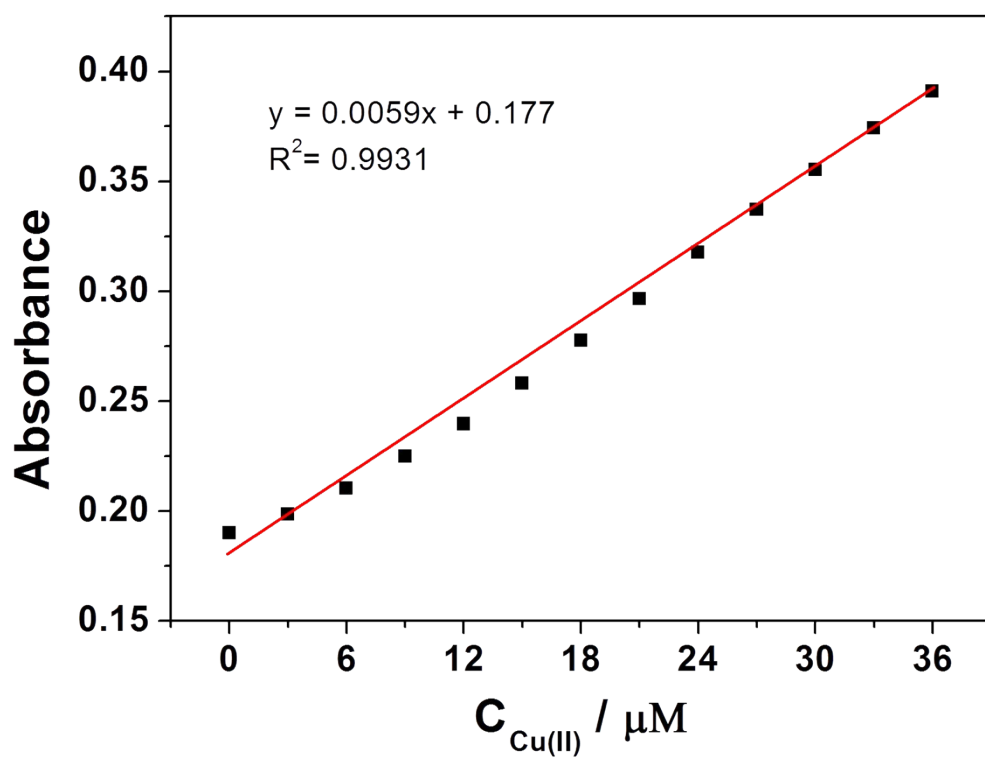

**Figure S6.** Absorption (at 412 nm) of **1** as a function of Cu(II) concentration.  $[\mathbf{1}] = 20 \mu\text{mol/L}$  and  $[\text{Cu(II)}] = 0\text{-}36.0 \mu\text{mol/L}$ .

(a)

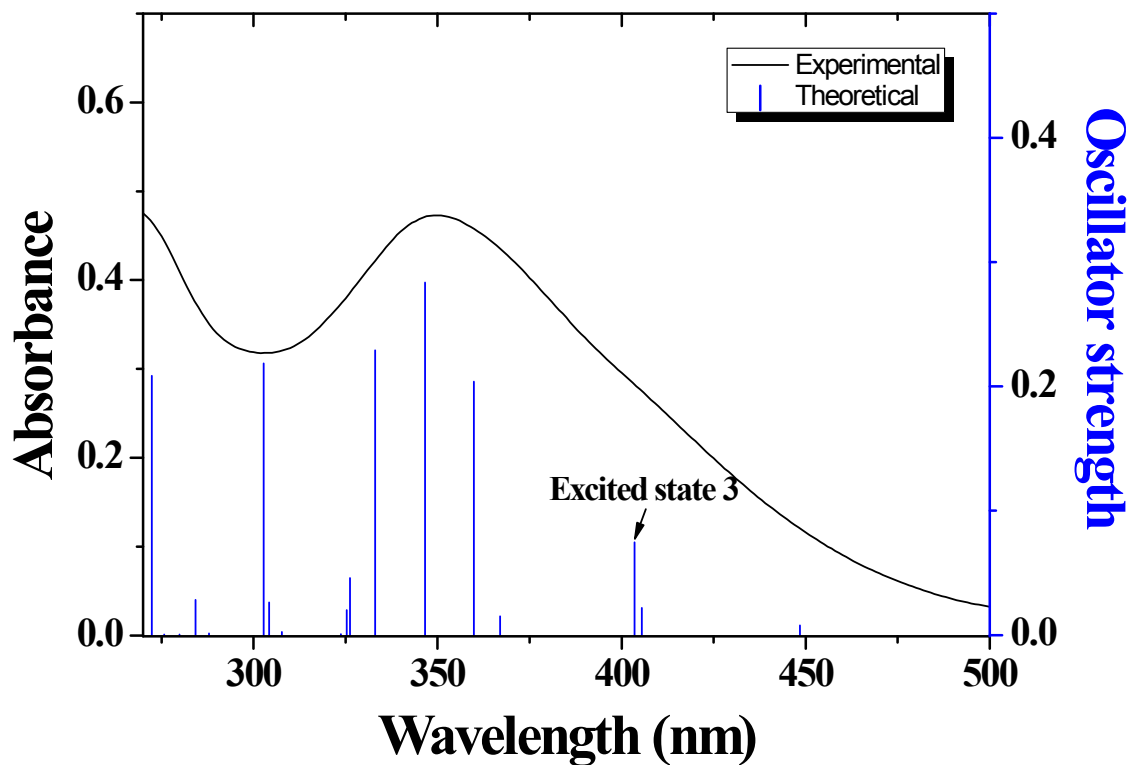

(b)

| Excited State 3 | Wavelength | Percent (%) | Main character | Oscillator strength |
|-----------------|------------|-------------|----------------|---------------------|
| H - 1 → L       | 403.53 nm  | 93%         | ICT            | 0.0747              |
| H → L + 1       |            | 5%          |                |                     |

**Figure S7.** (a) The theoretical excitation energies and the experimental UV-vis spectrum of **1**. (b) The major electronic transition energies and molecular orbital contributions for **1** (H = HOMO and L = LUMO).



(a)

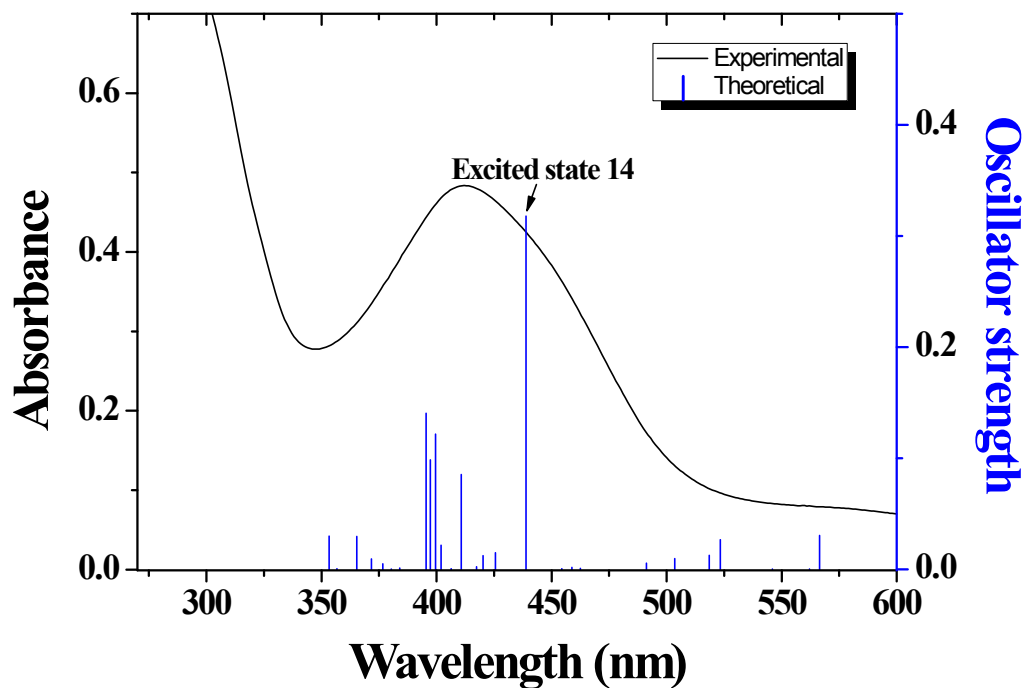

(b)

| Excited State 14                 | Wavelength | Percent (%) | Main character | Oscillator strength |
|----------------------------------|------------|-------------|----------------|---------------------|
| H $\rightarrow$ L+1 ( $\alpha$ ) | 438.86 nm  | 45%         | ICT            | 0.3178              |
| H $\rightarrow$ L+2 ( $\beta$ )  |            | 40%         | ICT            |                     |

**Figure S8.** (a) The theoretical excitation energies and the experimental UV-vis spectrum of **1-Cu<sup>2+</sup>**. (b) The major electronic transition energies and molecular orbital contributions for **1-Cu<sup>2+</sup>** (H = HOMO and L = LUMO / ( $\alpha$ ):  $\alpha$  spin MO and ( $\beta$ ):  $\beta$  spin MO).

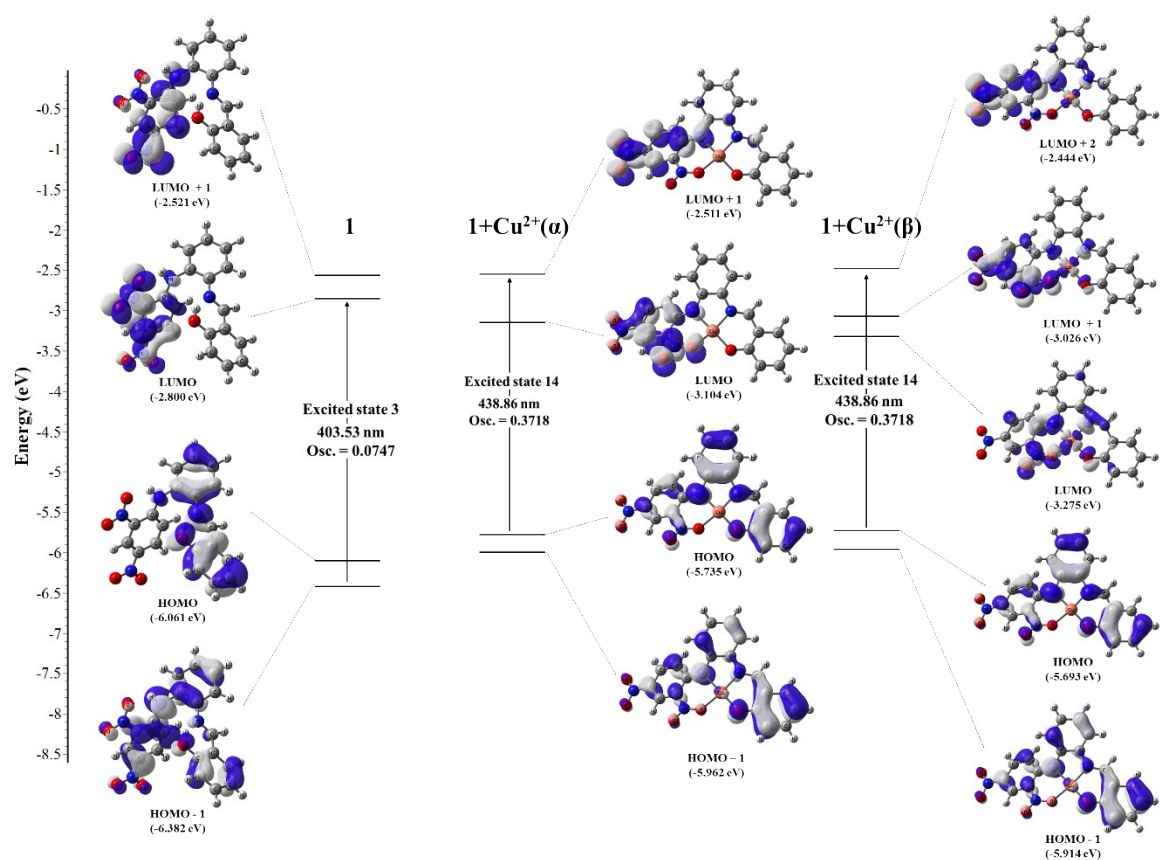

**Figure S9.** Molecular orbital diagrams and excitation energies of **1** and  $1\text{-Cu}^{2+}$ .

(a)

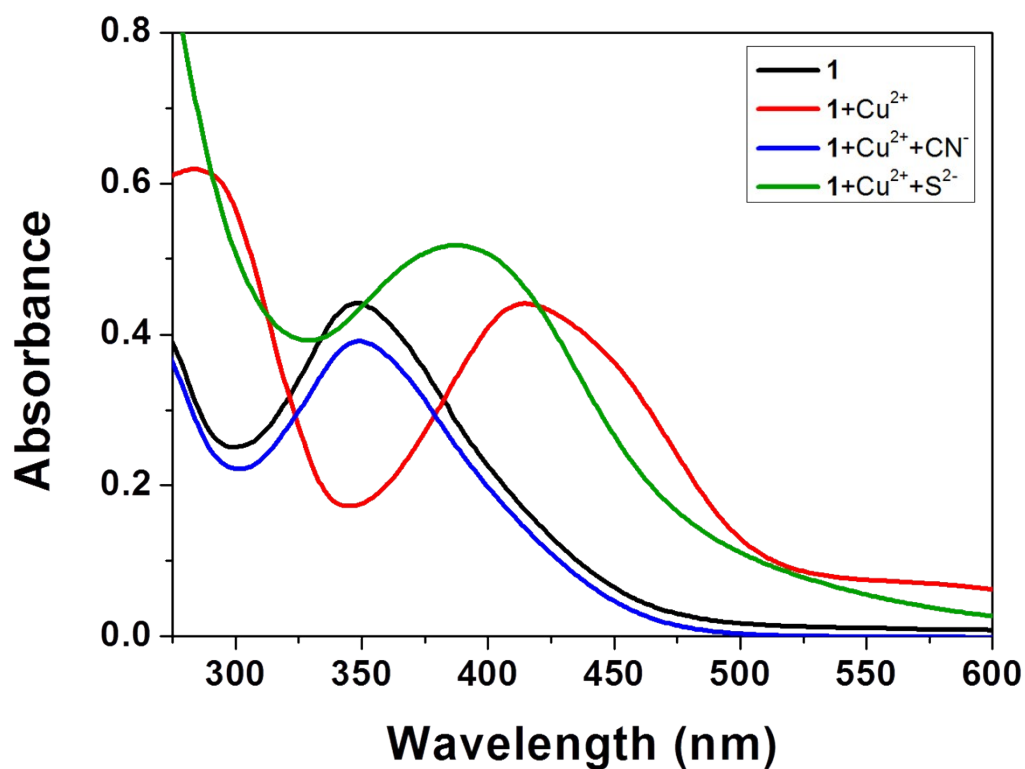

(b)

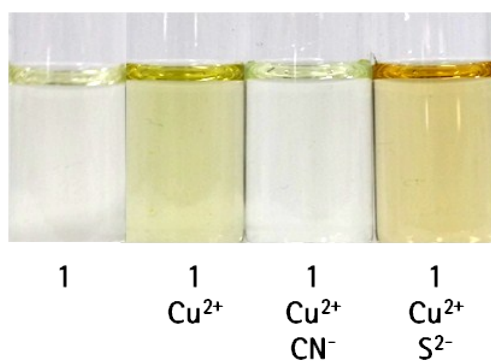

**Figure S10.** (a) Absorption spectra and (b) color changes of **1**, **1**-Cu<sup>2+</sup> complex, **1**-Cu<sup>2+</sup> complex + CN<sup>-</sup> and **1**-Cu<sup>2+</sup> complex + S<sup>2-</sup> in a mixture of bis-tris buffer/DMSO (1:1, v/v). Conditions; **1** = 20  $\mu$ M, Cu<sup>2+</sup> = 8 equiv, CN<sup>-</sup> = 70 equiv, and S<sup>2-</sup> = 80 equiv.

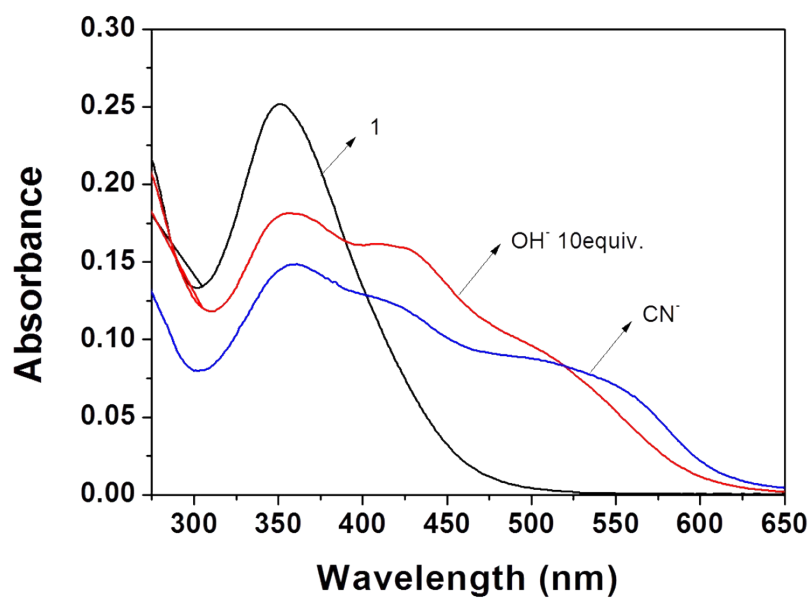

**Figure S11.** Absorption changes of **1** (10 μM) in the presence of TBAOH (10 equiv) and TBACN (100 equiv), respectively, in bis-tris buffer/DMSO (v/v=1:9).

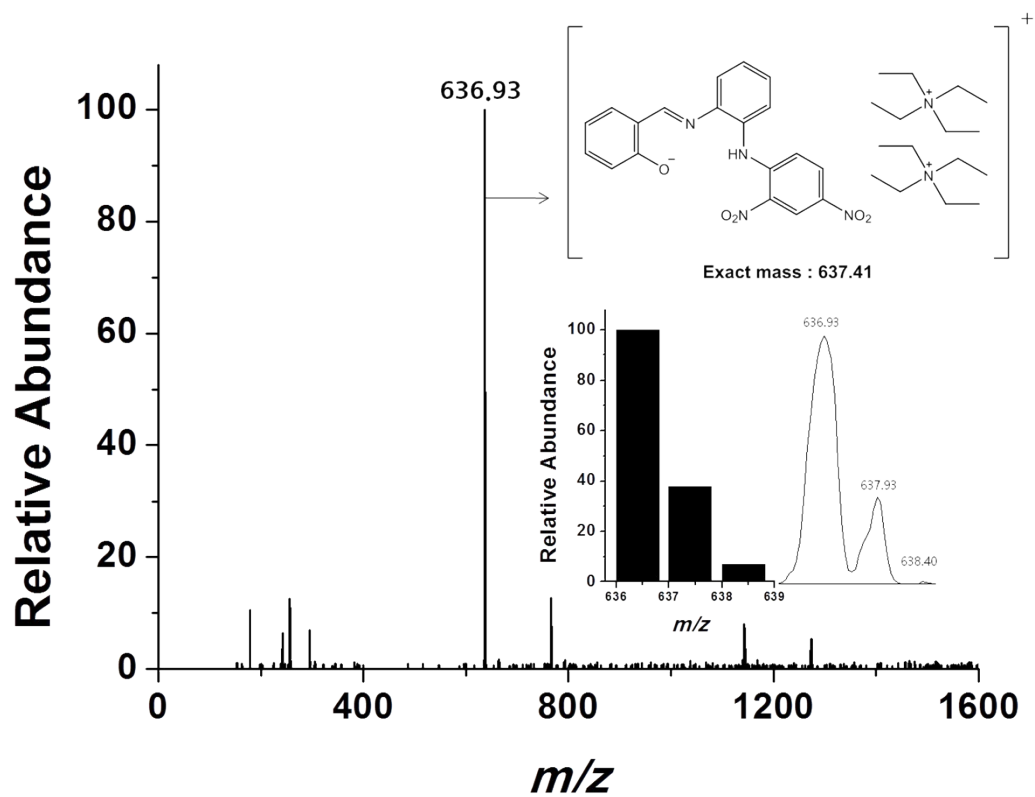

**Figure S12.** Positive-ion electrospray ionization mass spectrum of **1** (0.1 mM) upon addition of  $\text{CN}^-$  (0.1 mM).

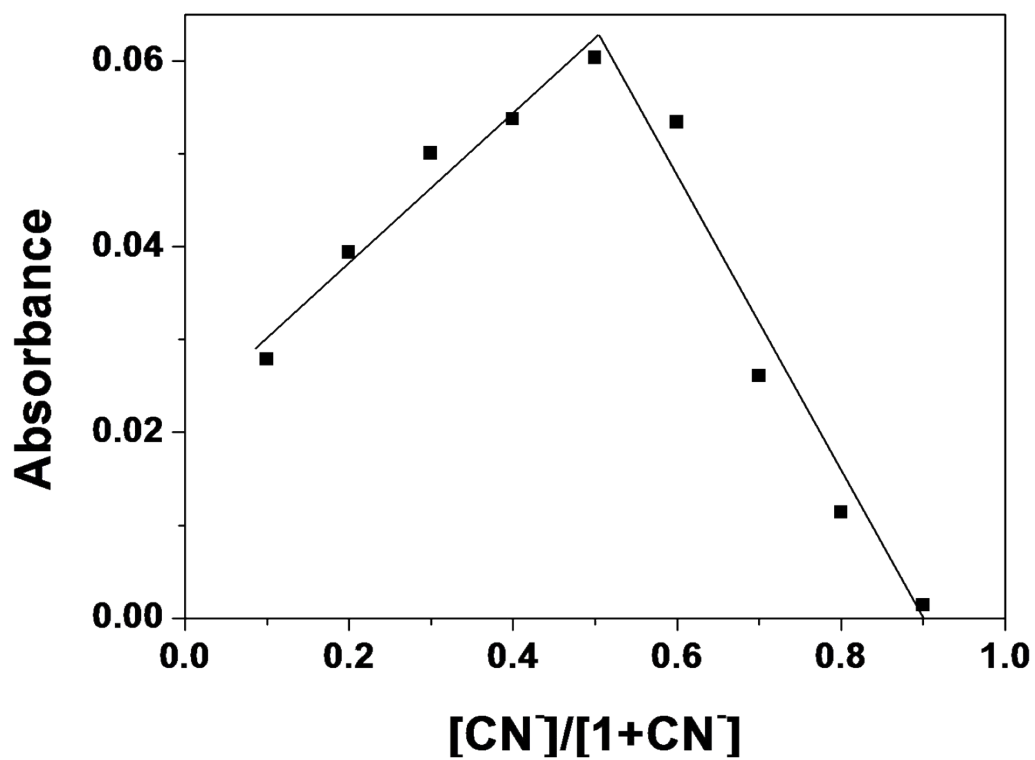

**Figure S13.** Job plot for the reaction of **1** with  $CN^-$ . Absorbance at 500 nm was plotted as a function of the molar ratio  $[CN^-]/[1+CN^-]$ . The total concentrations of  $CN^-$  with receptor **1** were 100  $\mu M$ .

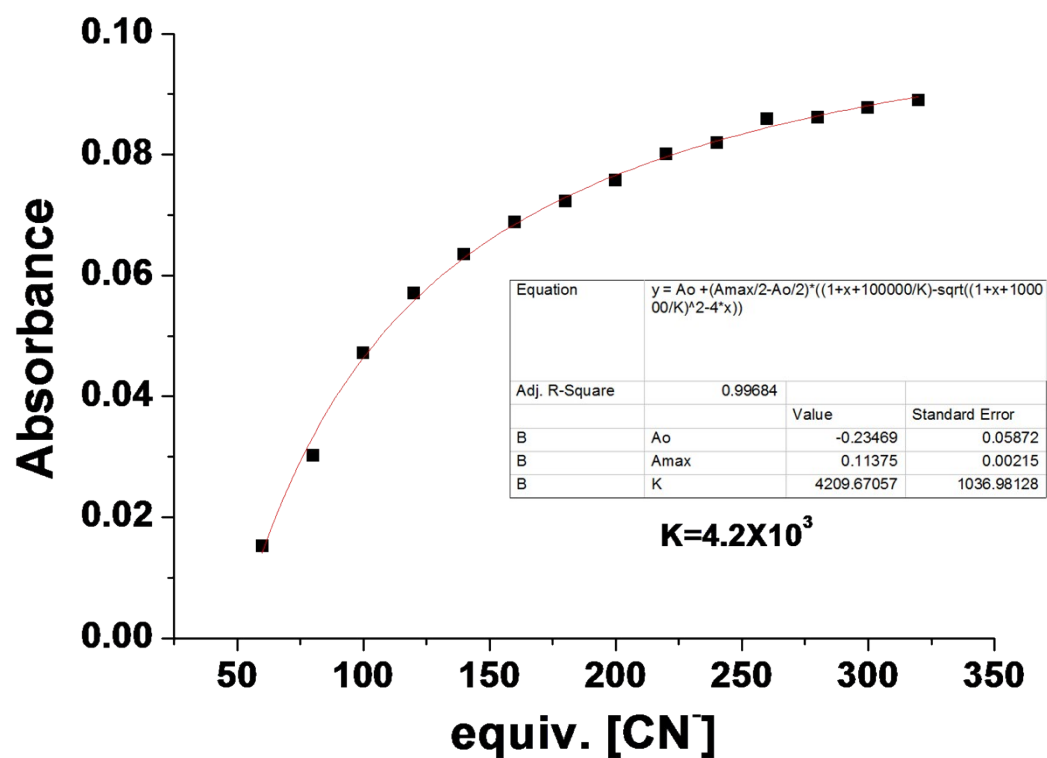

**Figure S14.** UV-vis absorbance of **1** (10  $\mu$ M) after addition of increasing different concentration of  $CN^-$ . The red line is the non-linear fitting curve between **1** and  $CN^-$ .

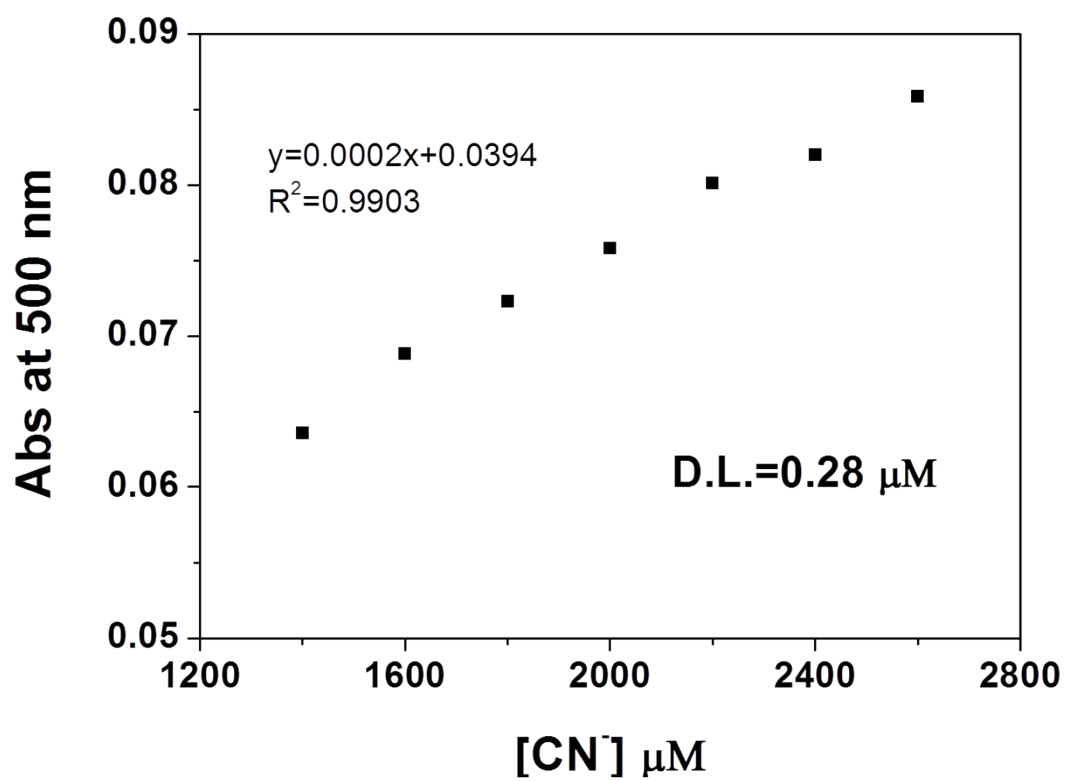

**Figure S15.** Determination of the detection limit based on change in the ratio (absorbance at 500 nm) of **1** ( $10 \mu\text{M}$ ) with  $\text{CN}^-$ .



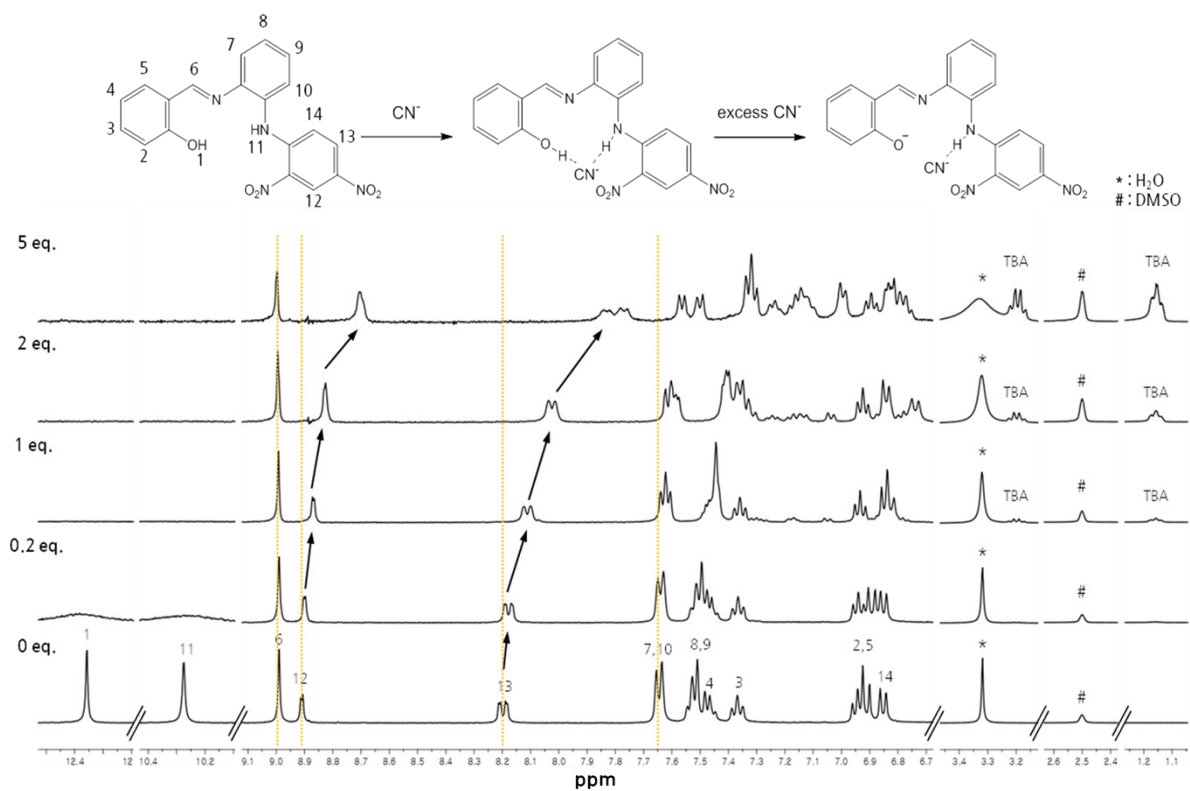

**Figure S16.**  $^1\text{H}$  NMR titration of receptor **1** with  $\text{CN}^-$ .

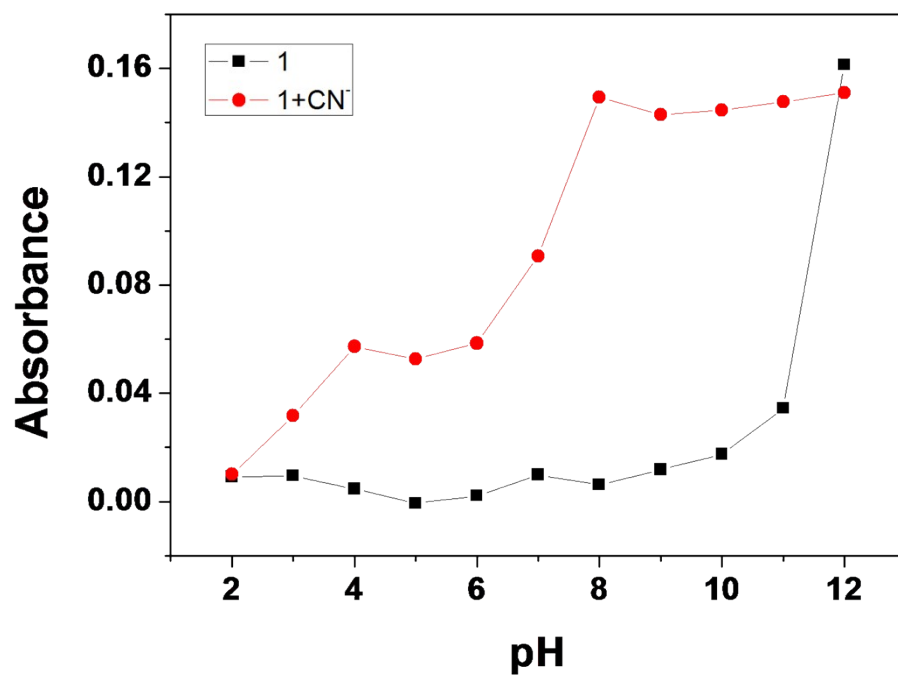

**Figure S17.** Absorbance of **1** and **1-CN<sup>-</sup>** (500 nm) at different pH values (2-12) in a mixture of bis-tris buffer/DMSO (1:9, v/v).

(a)

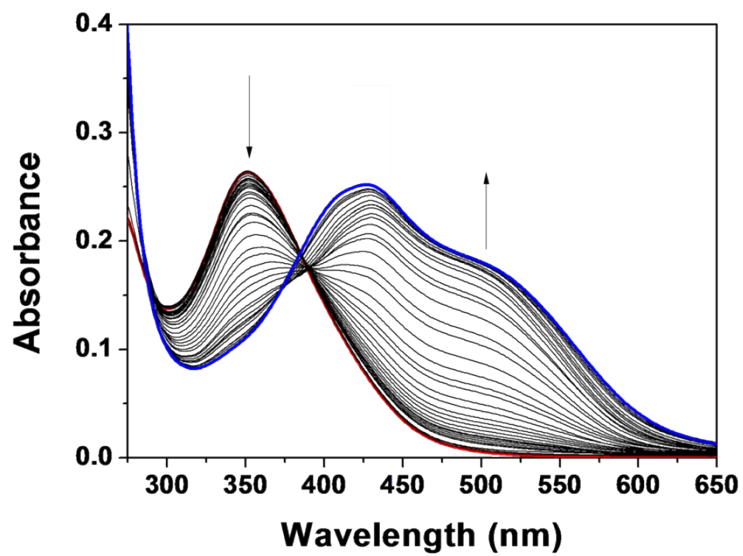

(b)

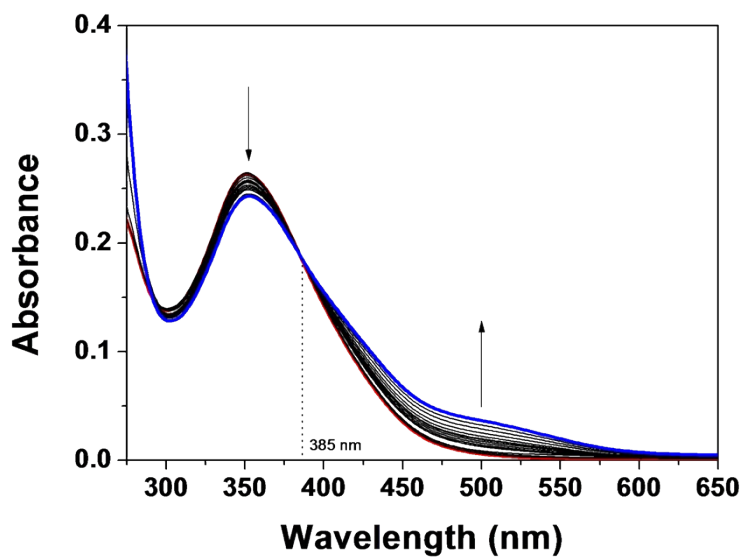

(c)

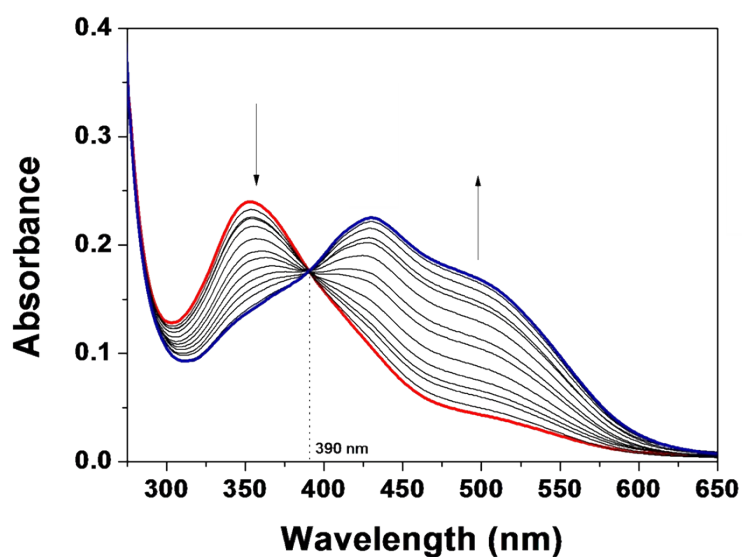

(d)

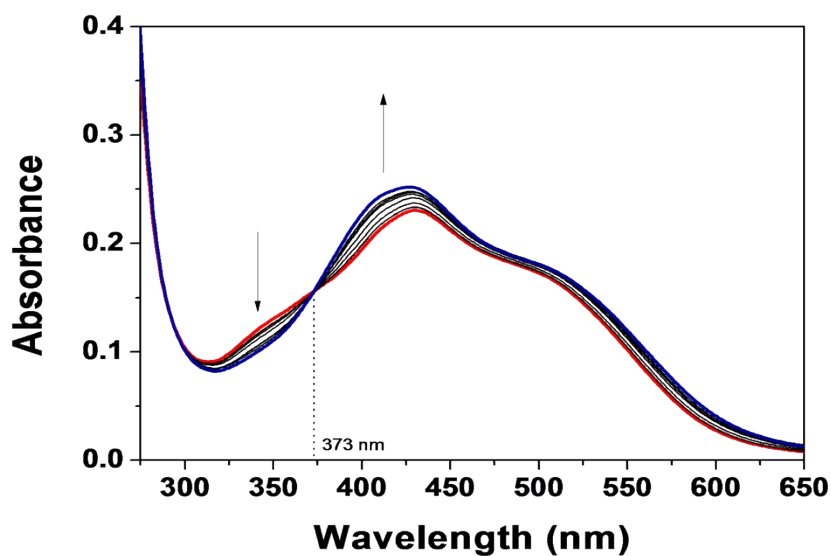

**Figure S18.** (a) Absorption spectral changes of **1** (10 μM) in the presence of different concentrations of S<sup>2-</sup> (from 0 to 88 equiv) at room temperature. (b) Absorption spectral changes of **1** (10 μM), extracted from the range of 0-60 equiv of S<sup>2-</sup> in (a). (c) Absorption spectral changes of **1** (10 μM), extracted from the range of 65-75 equiv of S<sup>2-</sup> in (a). (d) Absorption spectral changes of **1** (10 μM), extracted from the range of 75-88 equiv of S<sup>2-</sup> in

(a).

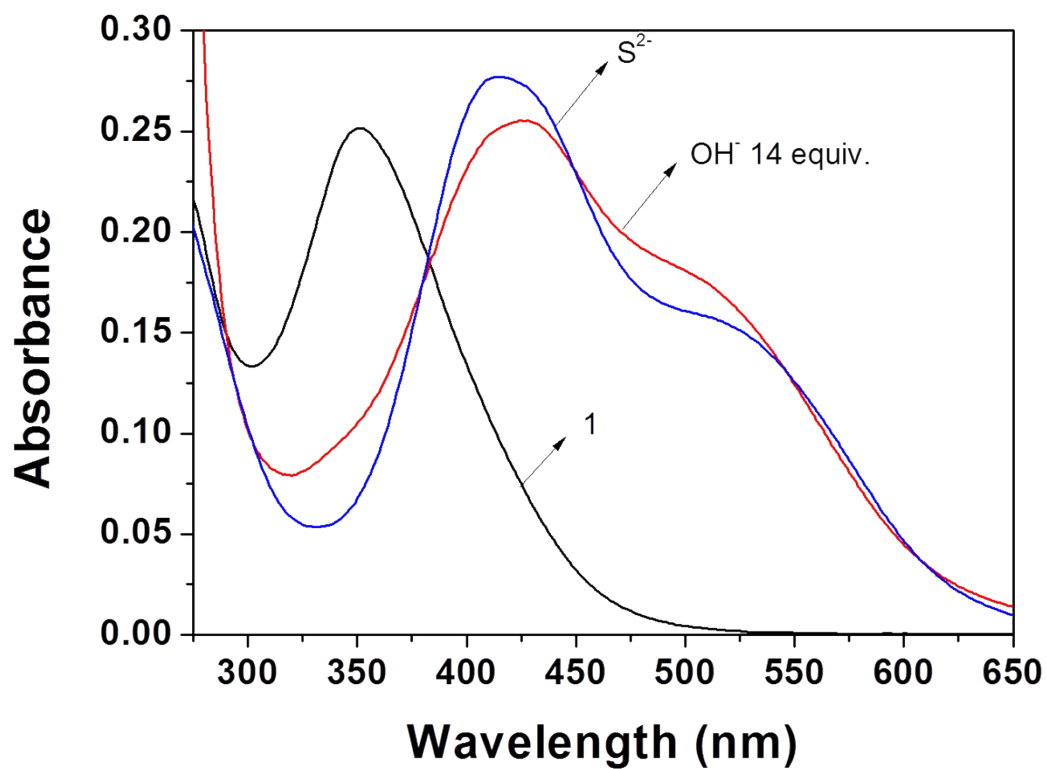

**Figure S19.** Absorption spectra of **1** (10  $\mu\text{M}$ ), and **1** (10  $\mu\text{M}$ ) in the presence of TBAOH (14 equiv) and  $\text{Na}_2\text{S}$  (88 equiv), respectively, in bis-tris buffer/DMSO (v/v=1:9).

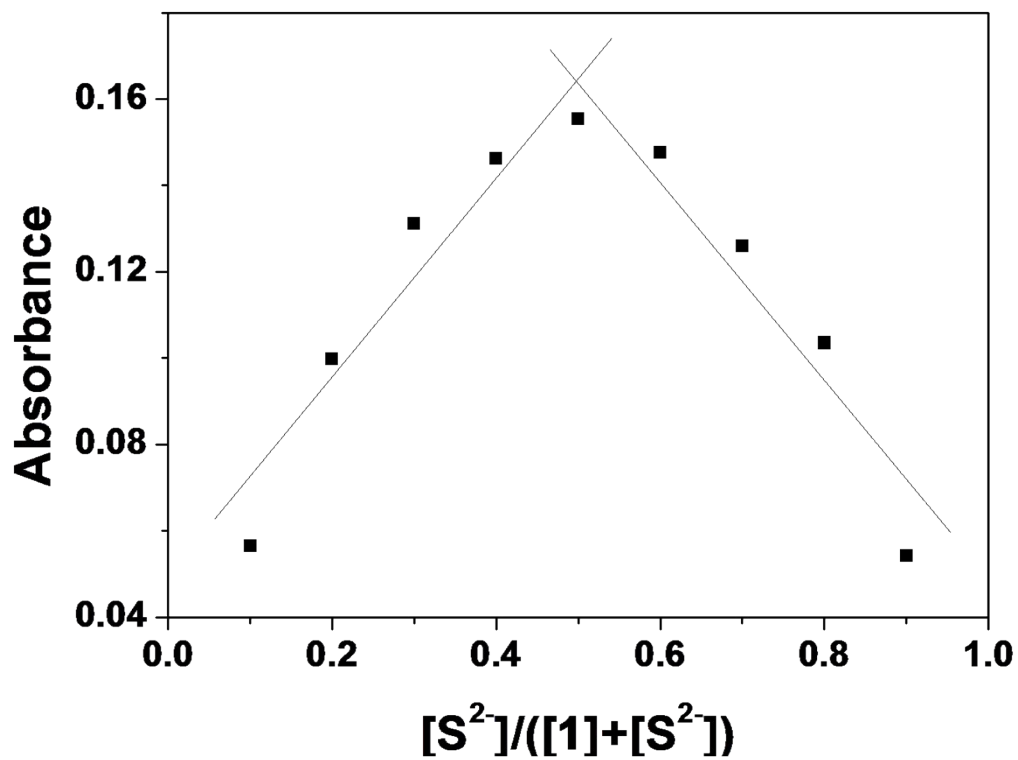

**Figure S20.** Job plot for the reaction of **1** with  $S^{2-}$ . Absorbance at 427 nm was plotted as a function of the molar ratio  $[S^{2-}]/[1+S^{2-}]$ . The total concentrations of  $S^{2-}$  with receptor **1** were 100  $\mu$ M.

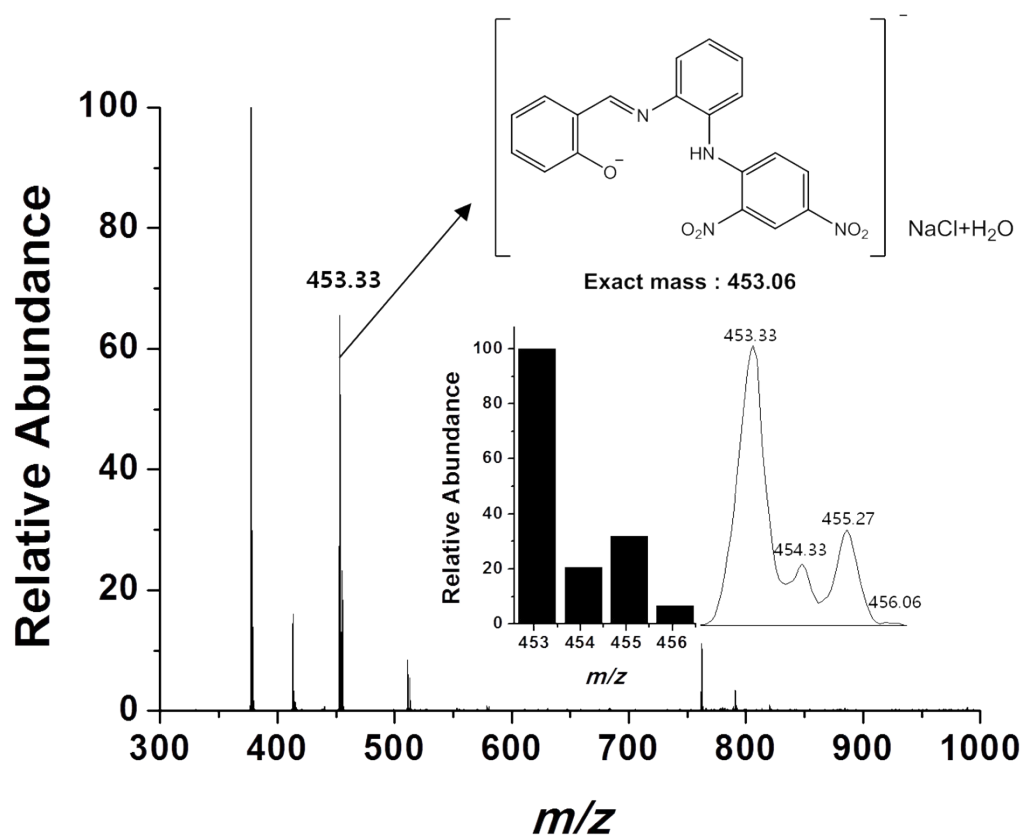

**Figure S21.** Negative-ion electrospray ionization mass spectrum of **1** (0.1 mM) upon addition of S<sup>2-</sup> (0.1 mM).

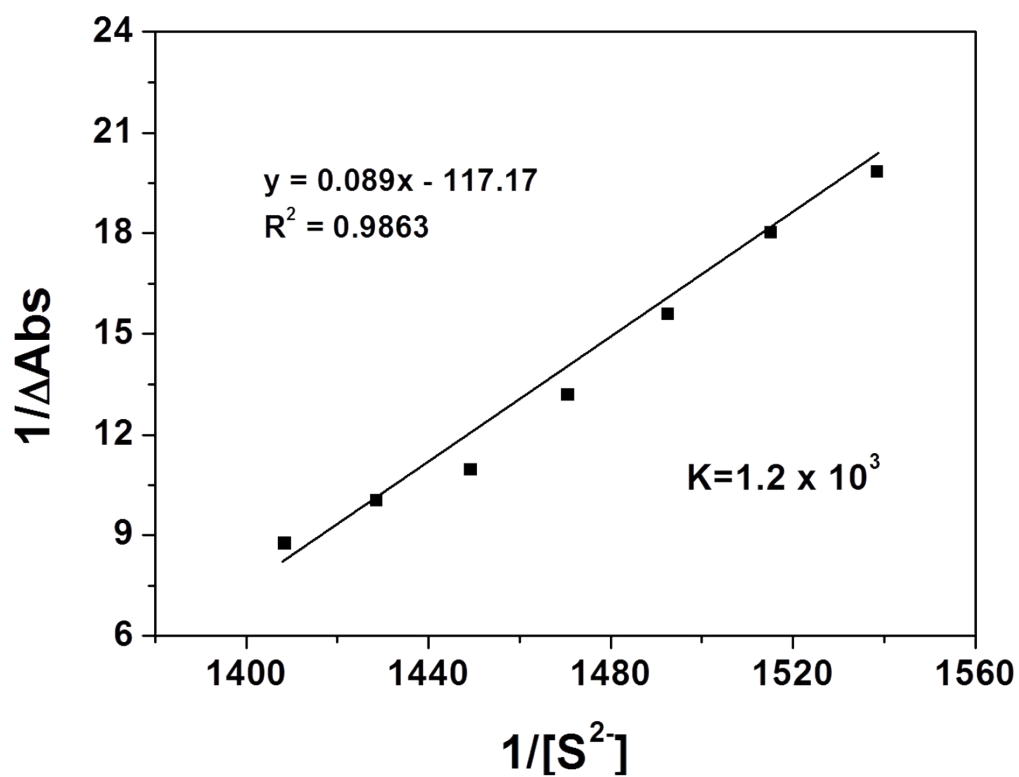

**Figure S22.** Benesi-Hidebrand equation plot (absorbance at 427 nm) of **1** (10 $\mu\text{M}$ ), assuming 1:1 stoichiometry for association between **1** and  $\text{S}^{2-}$ .



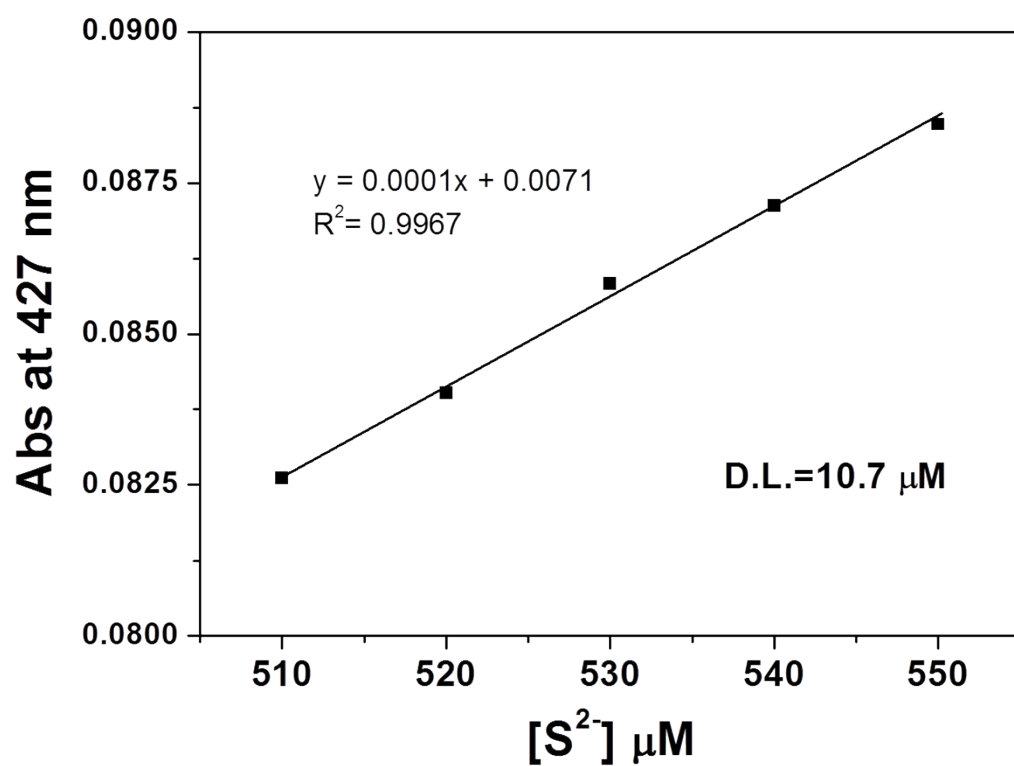

**Figure S23.** Determination of the detection limit based on change in the ratio (absorbance at 427 nm) of **1** (10  $\mu M$ ) with  $S^{2-}$ .

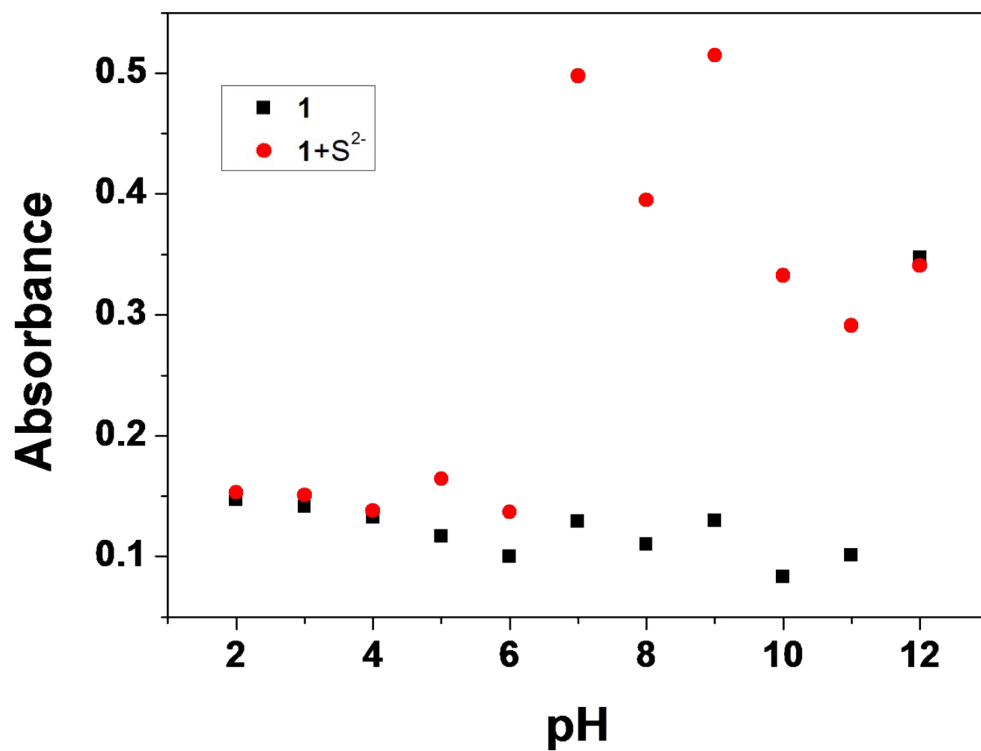

**Figure S24.** Absorbance (427 nm) of **1** and **1-S<sup>2-</sup>** at different pH values (2-12) in a mixture of bis-tris buffer/DMSO (1:9, v/v).

(a)

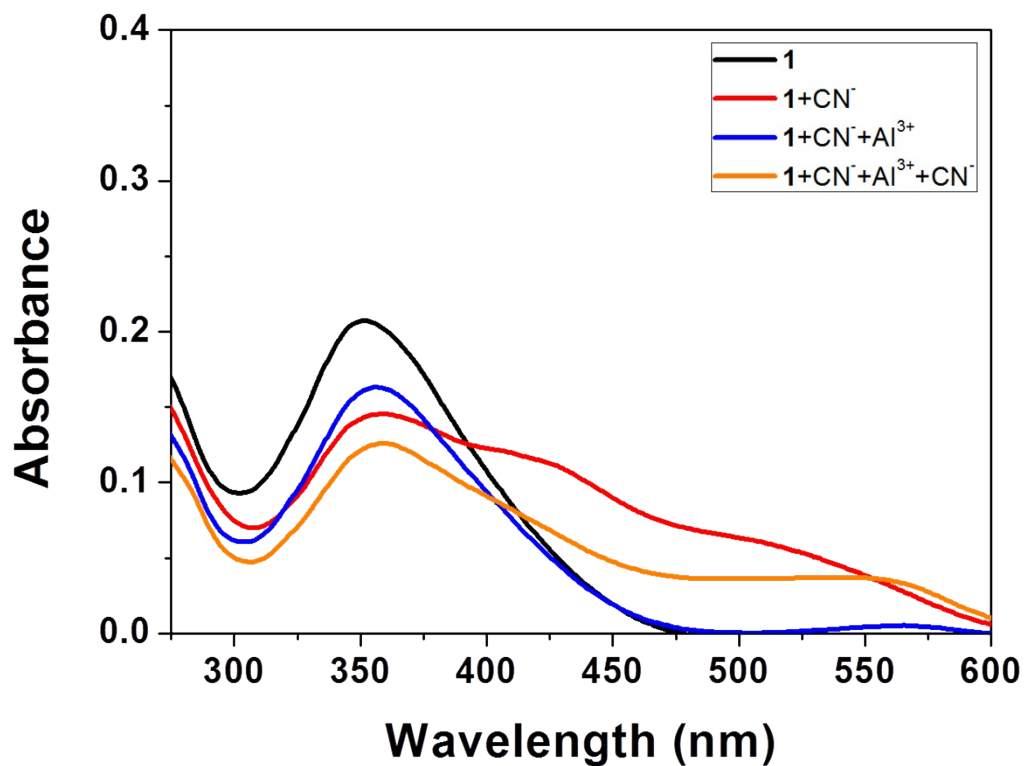

(b)

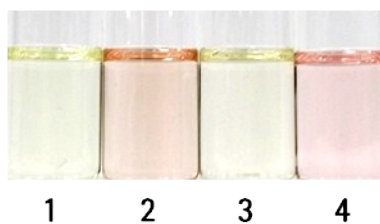

**Figure S25.** (a) Absorption spectra and (b) color changes of **1**, **1-CN<sup>-</sup>**, **1-CN<sup>-</sup> + Al<sup>3+</sup>** and **1-CN<sup>-</sup> + Al<sup>3+</sup> + CN<sup>-</sup>** in a mixture of bis-tris buffer/DMSO (1:9, v/v). Conditions: **1** = 10  $\mu\text{M}$ ,  $\text{CN}^-$  = 260 equiv, and  $\text{Al}^{3+}$  = 30 equiv.

(a)

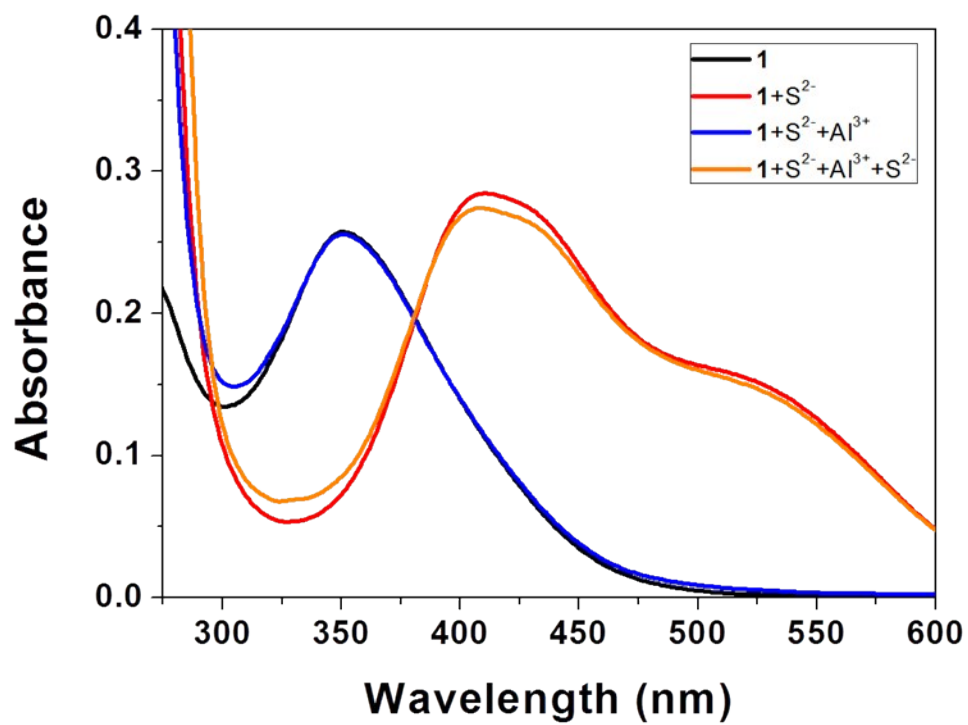

(b)

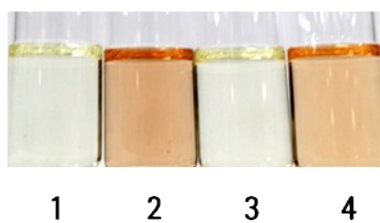

**Figure S26.** (a) Absorption spectra and (b) color changes of **1**, **1-S<sup>2-</sup>**, **1-S<sup>2-</sup> + Al<sup>3+</sup>** and **1-S<sup>2-</sup> + Al<sup>3+</sup> + S<sup>2-</sup>** in a mixture of bis-tris buffer/DMSO (1:9, v/v). Conditions: **1** = 10  $\mu$ M, S<sup>2-</sup> 88 equiv, and Al<sup>3+</sup> 30 equiv.
